# Supplementary material for: miR-503 represses human cell proliferation and directly targets the oncogene DDHD2 by non-canonical target pairing
Source: PubMed Central journal article supplement (PMC4326481; doi:10.1186/s12864-015-1279-9), 2015-02-05

A

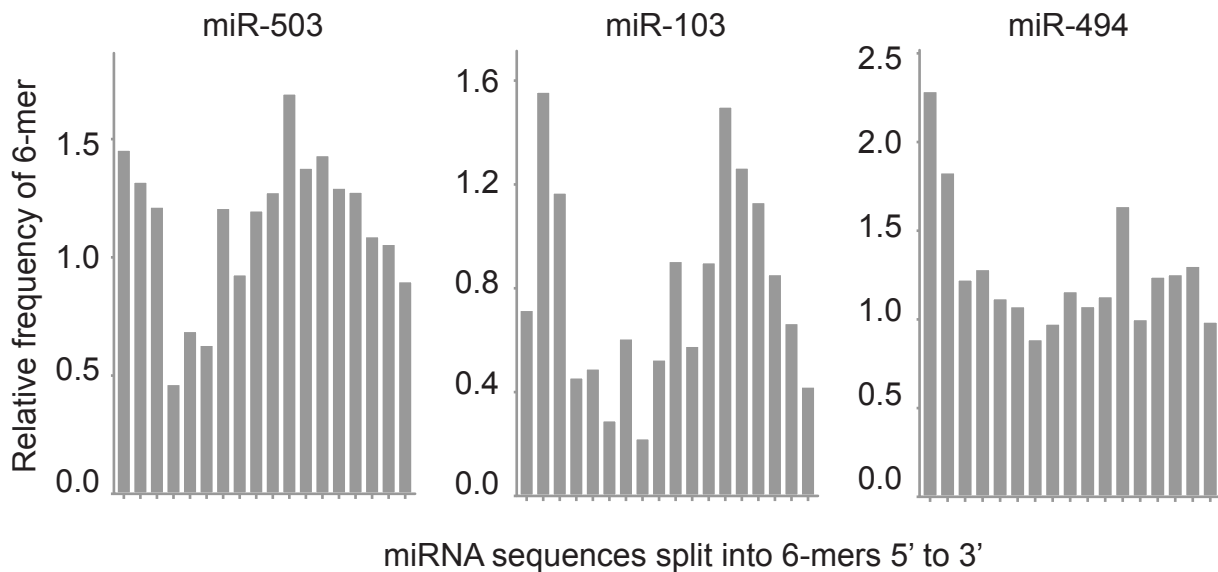

B

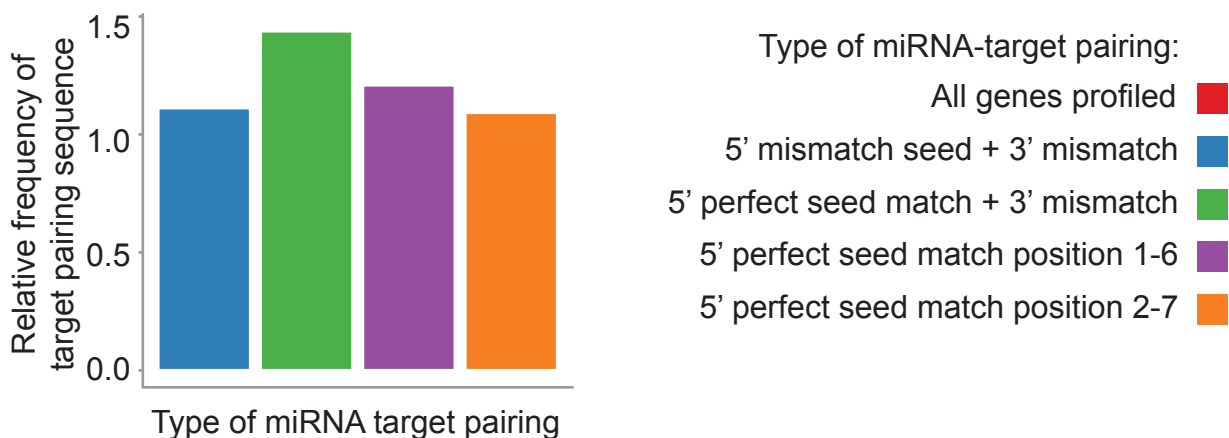

C

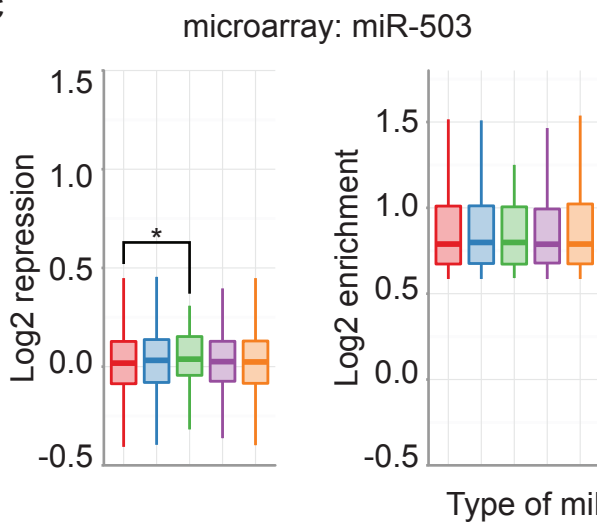

D

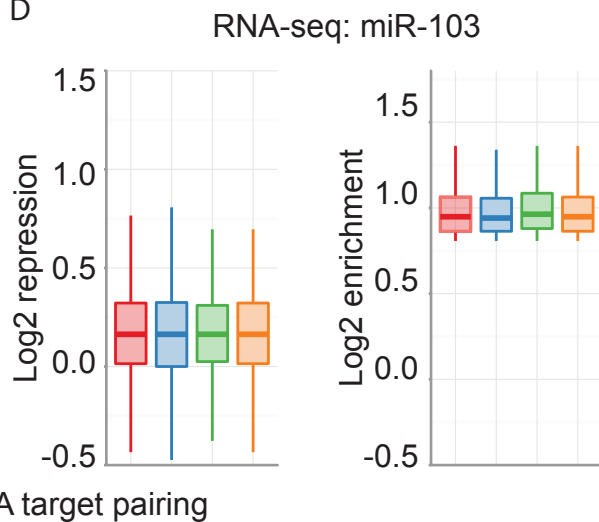

Supplement: 12864_2015_1279_MOESM3_ESM.pdf [file 12864_2015_1279_MOESM3_ESM.pdf]
